# Supplementary material for: A transcriptomic scan for potential candidate genes involved in osmoregulation in an obligate freshwater palaemonid prawn (Macrobrachium australiense)
Source: PubMed Central journal article supplement (PMC5068373; doi:10.7717/peerj.2520), 2016-10-05

Assay Class: Eukaryote Total RNA Nano  
 Data Path: C:\...Eukaryote Total RNA Nano\_DE13804083\_2014-04-15\_13-05-22.xad

Created: 15/04/2014 1:05:21 PM  
 Modified: 15/04/2014 1:29:08 PM

**Electrophoresis File Run Summary**

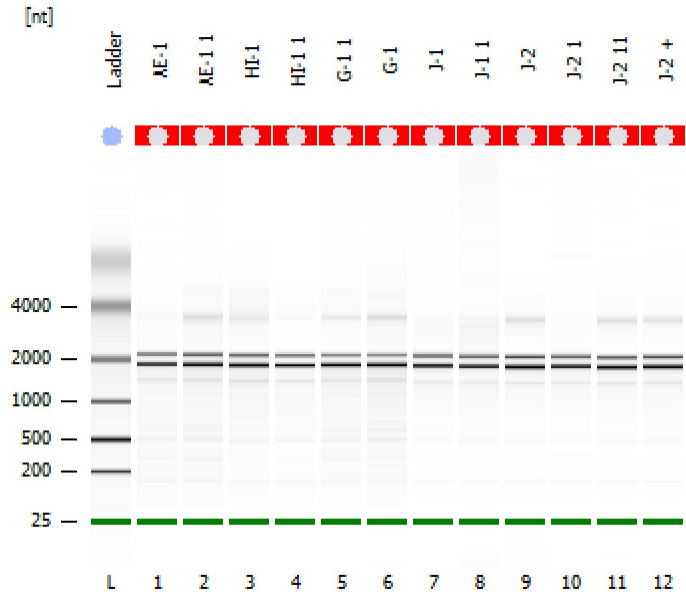

Instrument Information:

Instrument Name: DE13804083      Firmware: C.01.069  
 Serial#: DE13804083      Type: G2939A

Assay Information:

Assay Origin Path: C:\Program Files (x86)\Agilent\2100 bioanalyzer\2100 expert\assays\RNA\Eukaryote Total RNA Nano Series II.xsy  
 Assay Class: Eukaryote Total RNA Nano  
 Version: 2.6  
 Assay Comments: Total RNA Analysis ng sensitivity (Eukaryote)  
 © Copyright 2003 - 2009 Agilent Technologies, Inc.

Chip Information:

Chip Lot #:   
 Reagent Kit Lot #:   
 Chip Comments:

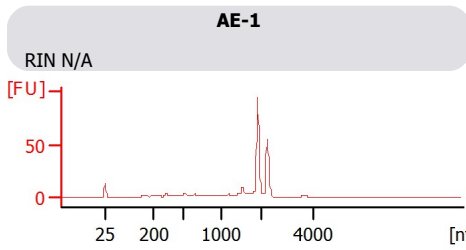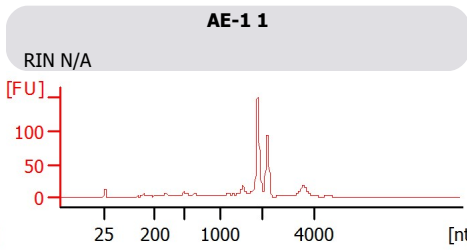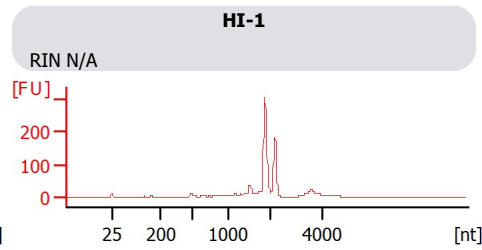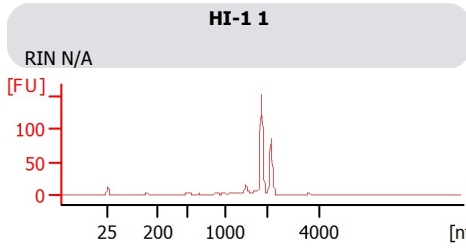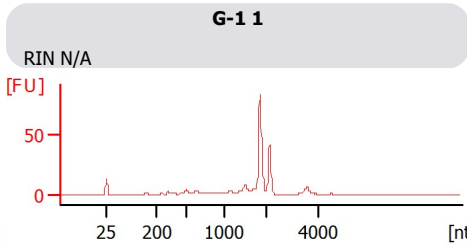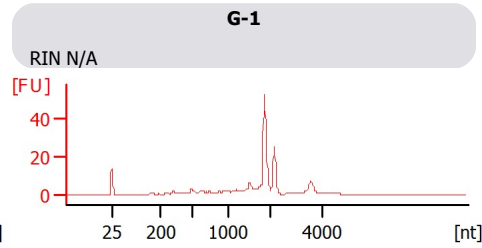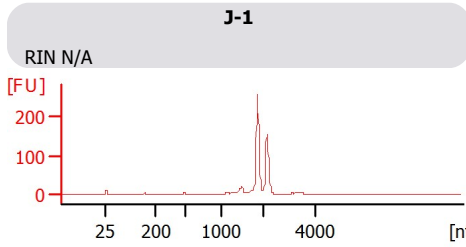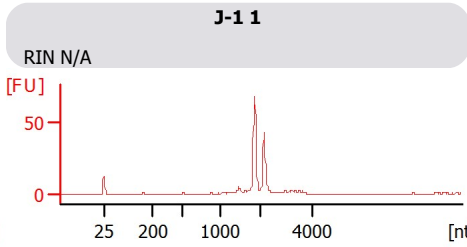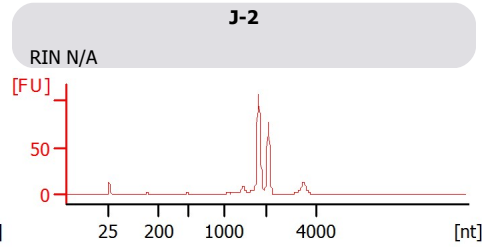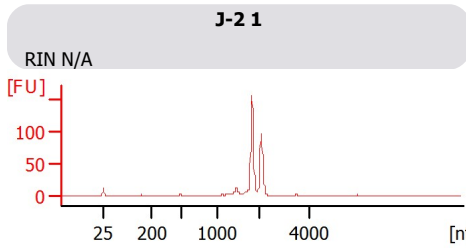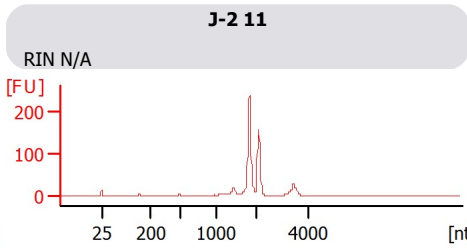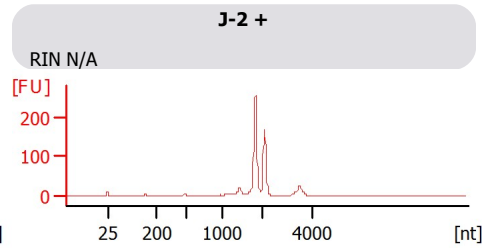

Assay Class: Eukaryote Total RNA Nano  
 Data Path: C:\...Eukaryote Total RNA Nano\_DE13804083\_2014-04-15\_13-05-22.xad

Created: 15/04/2014 1:05:21 PM  
 Modified: 15/04/2014 1:29:08 PM

**Electrophoresis File Run Summary (Chip Summary)**

| Sample Name | Sample Comment | Status | Result Label      | Result Color |
|-------------|----------------|--------|-------------------|--------------|
| AE-1        |                | ✓      | RIN N/A           |              |
| AE-1 1      |                | ✓      | RIN N/A           |              |
| HI-1        |                | ✓      | RIN N/A           |              |
| HI-1 1      |                | ✓      | RIN N/A           |              |
| G-1 1       |                | ✓      | RIN N/A           |              |
| G-1         |                | ✓      | RIN N/A           |              |
| J-1         |                | ✓      | RIN N/A           |              |
| J-1 1       |                | ✓      | RIN N/A           |              |
| J-2         |                | ✓      | RIN N/A           |              |
| J-2 1       |                | ✓      | RIN N/A           |              |
| J-2 11      |                | ✓      | RIN N/A           |              |
| J-2 +       |                | ✓      | RIN N/A           |              |
| Ladder      |                | ✓      | All Other Samples |              |

**Chip Lot #**

**Reagent Kit Lot #**

**Chip Comments :**

Assay Class: Eukaryote Total RNA Nano  
Data Path: C:\...\Eukaryote Total RNA Nano\_DE13804083\_2014-04-15\_13-05-22.xad

Created: 15/04/2014 1:05:21 PM  
Modified: 15/04/2014 1:29:08 PM

## Electrophoresis Assay Details

### General Analysis Settings

Number of Available Sample and Ladder Wells (Max.) : 13  
Minimum Visible Range [s] : 17  
Maximum Visible Range [s] : 70  
Start Analysis Time Range [s] : 19  
End Analysis Time Range [s] : 69  
Ladder Concentration [ng/ $\mu$ l] : 150  
Lower Marker Concentration [ng/ $\mu$ l] : 0  
Upper Marker Concentration [ng/ $\mu$ l] : 0  
Used Lower Marker for Quantitation  
Standard Curve Fit is Logarithmic  
Show Data Aligned to Lower Marker

### Integrator Settings

Integration Start Time [s] : 19  
Integration End Time [s] : 69  
Slope Threshold : 0.6  
Height Threshold [FU] : 0.5  
Area Threshold : 0.2  
Width Threshold [s] : 0.5  
Baseline Plateau [s] : 6

### Filter Settings

Filter Width [s] : 0.5  
Polynomial Order : 4

### Ladder

| Ladder Peak | Size |
|-------------|------|
| 1           | 25   |
| 2           | 200  |
| 3           | 500  |
| 4           | 1000 |
| 5           | 2000 |
| 6           | 4000 |

Assay Class: Eukaryote Total RNA Nano  
Data Path: C:\...Eukaryote Total RNA Nano\_DE13804083\_2014-04-15\_13-05-22.xad

Created: 15/04/2014 1:05:21 PM  
Modified: 15/04/2014 1:29:08 PM

**Electropherogram Summary**

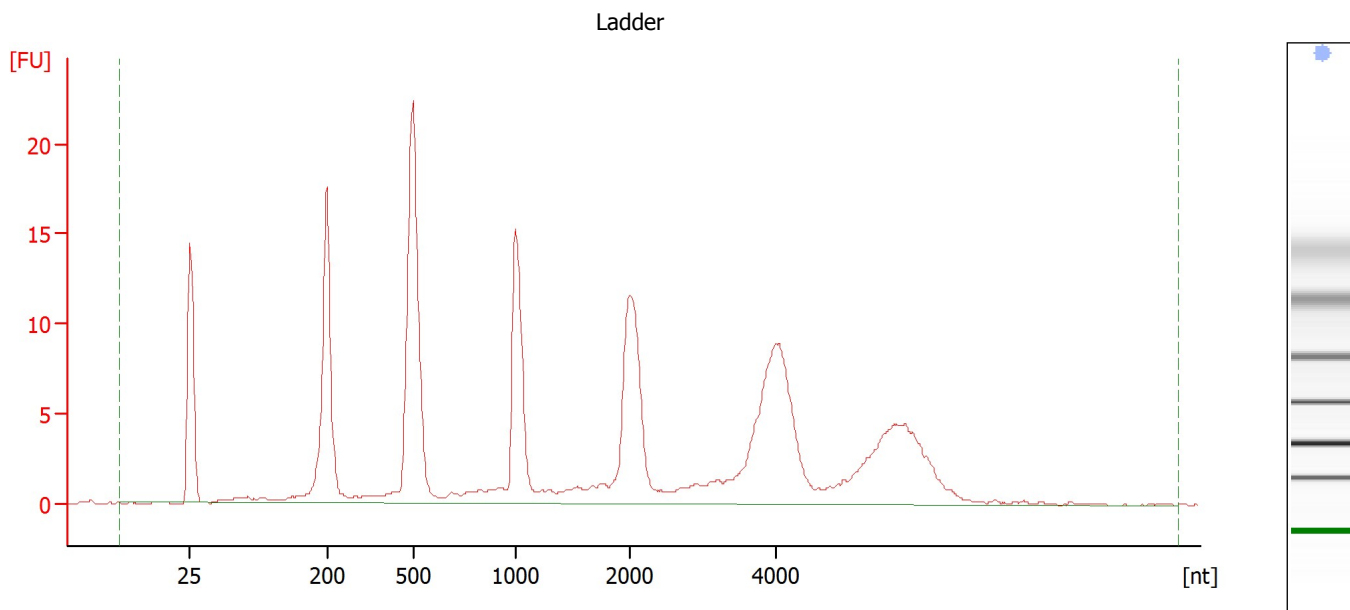

**Overall Results for Ladder**

|                    |                 |                        |                                                                                                                             |
|--------------------|-----------------|------------------------|-----------------------------------------------------------------------------------------------------------------------------|
| RNA Area:          | 207.2           | Result Flagging Color: | <span style="background-color: #add8e6; border: 1px solid black; display: inline-block; width: 20px; height: 10px;"></span> |
| RNA Concentration: | 150 ng/ $\mu$ l | Result Flagging Label: | All Other Samples                                                                                                           |

Assay Class: Eukaryote Total RNA Nano  
 Data Path: C:\...Eukaryote Total RNA Nano\_DE13804083\_2014-04-15\_13-05-22.xad

Created: 15/04/2014 1:05:21 PM  
 Modified: 15/04/2014 1:29:08 PM

**Electropherogram Summary Continued ...**

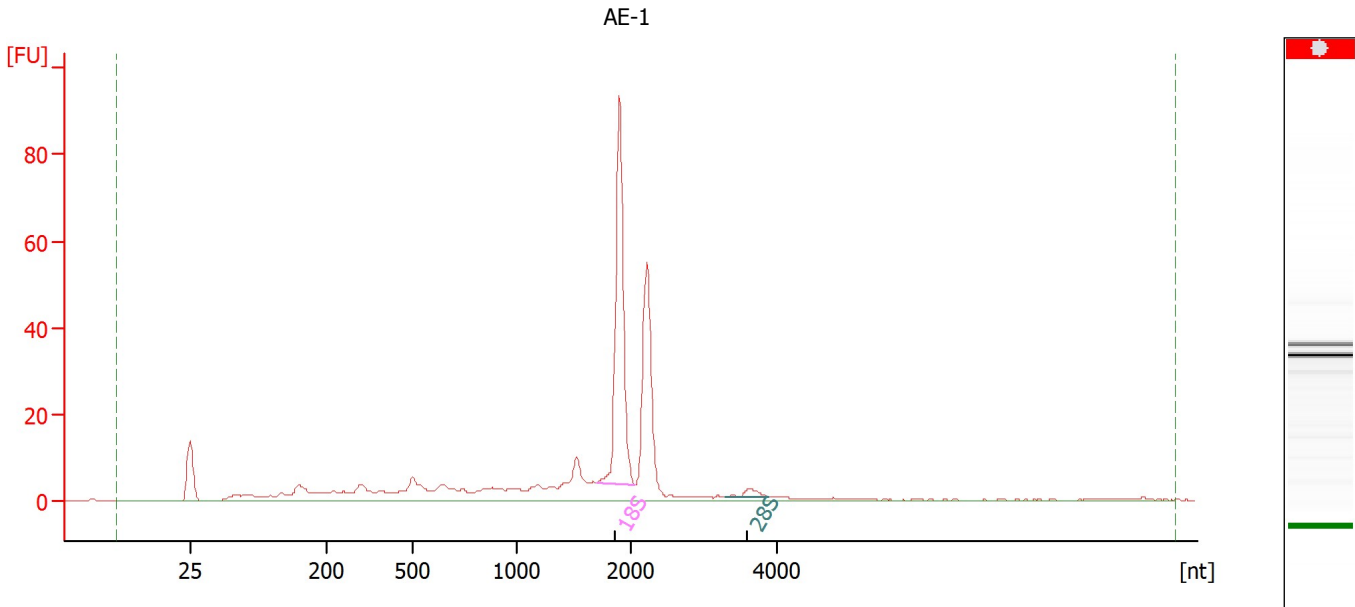

**Overall Results for sample 1 : AE-1**

|                         |           |                             |                                                                                                                             |
|-------------------------|-----------|-----------------------------|-----------------------------------------------------------------------------------------------------------------------------|
| RNA Area:               | 310.2     | RNA Integrity Number (RIN): | N/A (B.02.08)                                                                                                               |
| RNA Concentration:      | 225 ng/μl | Result Flagging Color:      | <span style="background-color: #cccccc; border: 1px solid black; display: inline-block; width: 20px; height: 10px;"></span> |
| rRNA Ratio [28s / 18s]: | 0.0       | Result Flagging Label:      | RIN N/A                                                                                                                     |

**Fragment table for sample 1 : AE-1**

| Name | Start Size [nt] | End Size [nt] | Area | % of total Area |
|------|-----------------|---------------|------|-----------------|
| 18S  | 1,697           | 2,046         | 86.1 | 27.8            |
| 28S  | 3,276           | 3,876         | 3.1  | 1.0             |

Assay Class: Eukaryote Total RNA Nano  
 Data Path: C:\...Eukaryote Total RNA Nano\_DE13804083\_2014-04-15\_13-05-22.xad

Created: 15/04/2014 1:05:21 PM  
 Modified: 15/04/2014 1:29:08 PM

**Electropherogram Summary Continued ...**

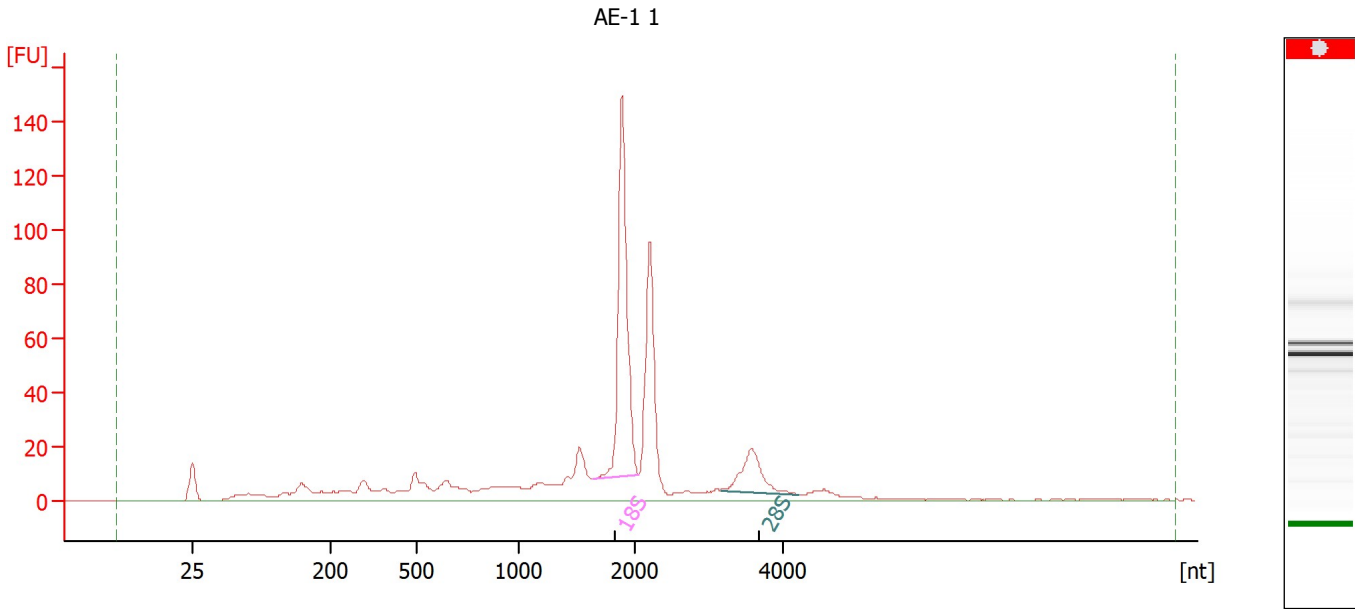

**Overall Results for sample 2 : AE-1 1**

|                         |           |                             |                                                                                                                             |
|-------------------------|-----------|-----------------------------|-----------------------------------------------------------------------------------------------------------------------------|
| RNA Area:               | 638.7     | RNA Integrity Number (RIN): | N/A (B.02.08)                                                                                                               |
| RNA Concentration:      | 462 ng/μl | Result Flagging Color:      | <span style="background-color: #cccccc; border: 1px solid black; display: inline-block; width: 20px; height: 10px;"></span> |
| rRNA Ratio [28s / 18s]: | 0.2       | Result Flagging Label:      | RIN N/A                                                                                                                     |

**Fragment table for sample 2 : AE-1 1**

| Name | Start Size [nt] | End Size [nt] | Area  | % of total Area |
|------|-----------------|---------------|-------|-----------------|
| 18S  | 1,636           | 2,034         | 153.9 | 24.1            |
| 28S  | 3,157           | 4,221         | 34.5  | 5.4             |

Assay Class: Eukaryote Total RNA Nano  
 Data Path: C:\...Eukaryote Total RNA Nano\_DE13804083\_2014-04-15\_13-05-22.xad

Created: 15/04/2014 1:05:21 PM  
 Modified: 15/04/2014 1:29:08 PM

**Electropherogram Summary Continued ...**

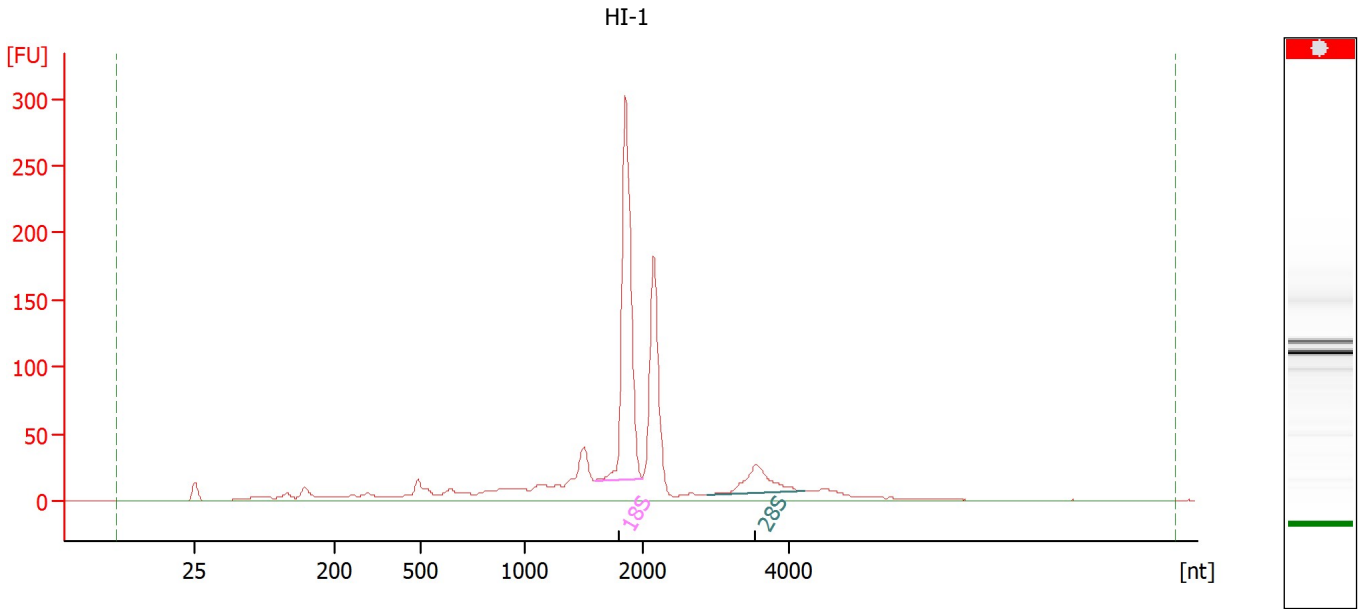

**Overall Results for sample 3 : HI-1**

|                         |           |                             |                                                                                                                             |
|-------------------------|-----------|-----------------------------|-----------------------------------------------------------------------------------------------------------------------------|
| RNA Area:               | 1,113.8   | RNA Integrity Number (RIN): | N/A (B.02.08)                                                                                                               |
| RNA Concentration:      | 806 ng/μl | Result Flagging Color:      | <span style="background-color: #cccccc; border: 1px solid black; display: inline-block; width: 20px; height: 10px;"></span> |
| rRNA Ratio [28s / 18s]: | 0.2       | Result Flagging Label:      | RIN N/A                                                                                                                     |

**Fragment table for sample 3 : HI-1**

| Name | Start Size [nt] | End Size [nt] | Area  | % of total Area |
|------|-----------------|---------------|-------|-----------------|
| 18S  | 1,604           | 2,009         | 313.7 | 28.2            |
| 28S  | 2,878           | 4,211         | 57.0  | 5.1             |

Assay Class: Eukaryote Total RNA Nano  
 Data Path: C:\...Eukaryote Total RNA Nano\_DE13804083\_2014-04-15\_13-05-22.xad

Created: 15/04/2014 1:05:21 PM  
 Modified: 15/04/2014 1:29:08 PM

**Electropherogram Summary Continued ...**

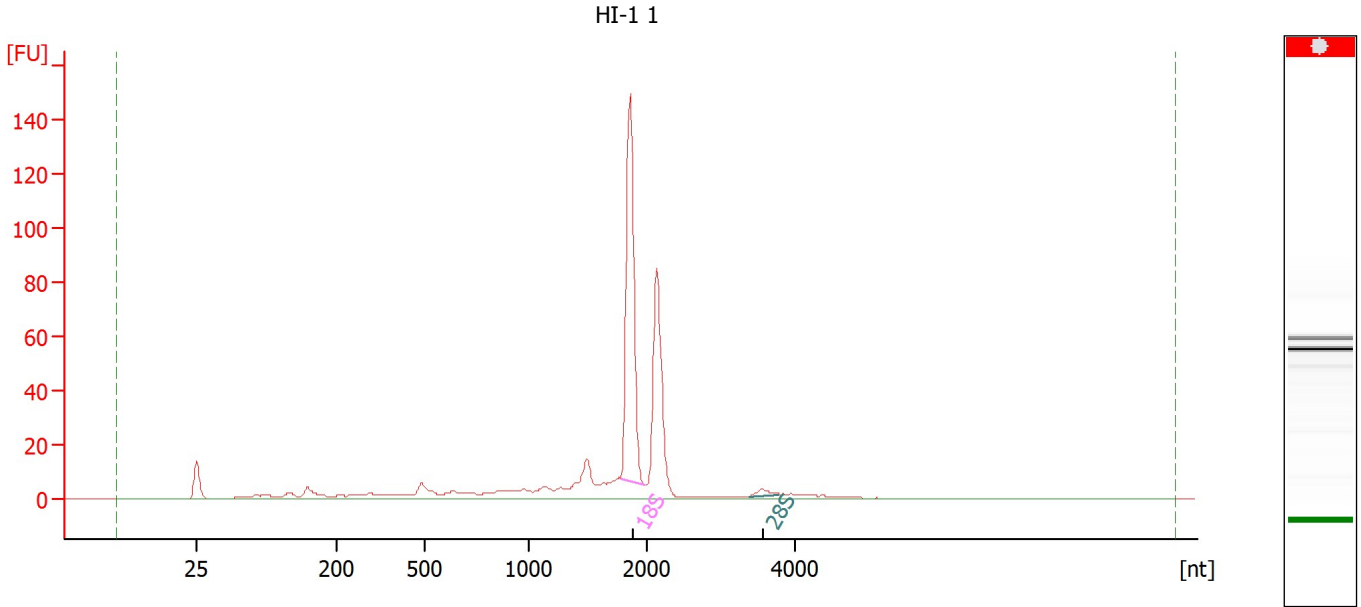

**Overall Results for sample 4 : HI-1 1**

|                         |           |                             |                                                                                                                             |
|-------------------------|-----------|-----------------------------|-----------------------------------------------------------------------------------------------------------------------------|
| RNA Area:               | 394.3     | RNA Integrity Number (RIN): | N/A (B.02.08)                                                                                                               |
| RNA Concentration:      | 286 ng/μl | Result Flagging Color:      | <span style="background-color: #cccccc; border: 1px solid black; display: inline-block; width: 20px; height: 10px;"></span> |
| rRNA Ratio [28s / 18s]: | 0.0       | Result Flagging Label:      | RIN N/A                                                                                                                     |

**Fragment table for sample 4 : HI-1 1**

| Name | Start Size [nt] | End Size [nt] | Area  | % of total Area |
|------|-----------------|---------------|-------|-----------------|
| 18S  | 1,780           | 1,989         | 130.5 | 33.1            |
| 28S  | 3,382           | 3,800         | 2.9   | 0.7             |



Assay Class: Eukaryote Total RNA Nano  
 Data Path: C:\...Eukaryote Total RNA Nano\_DE13804083\_2014-04-15\_13-05-22.xad

Created: 15/04/2014 1:05:21 PM  
 Modified: 15/04/2014 1:29:08 PM

**Electropherogram Summary Continued ...**

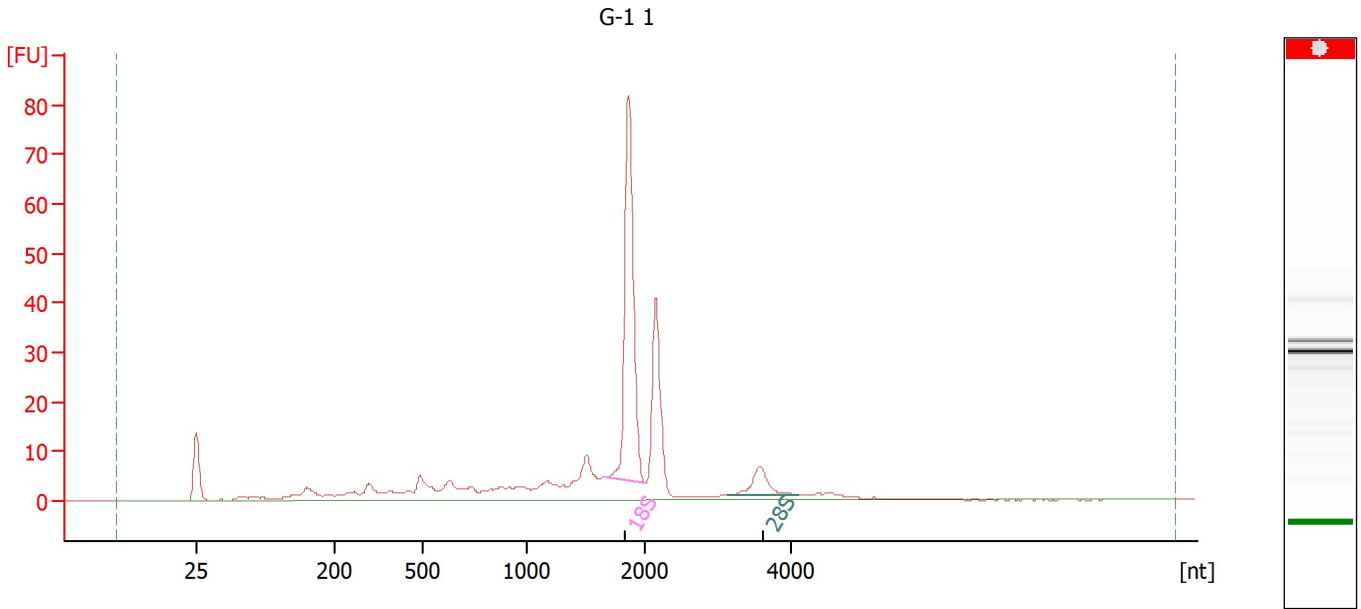

**Overall Results for sample 5 : G-1 1**

|                         |           |                             |                                                                                                                             |
|-------------------------|-----------|-----------------------------|-----------------------------------------------------------------------------------------------------------------------------|
| RNA Area:               | 281.9     | RNA Integrity Number (RIN): | N/A (B.02.08)                                                                                                               |
| RNA Concentration:      | 204 ng/μl | Result Flagging Color:      | <span style="background-color: #cccccc; border: 1px solid black; display: inline-block; width: 20px; height: 10px;"></span> |
| rRNA Ratio [28s / 18s]: | 0.1       | Result Flagging Label:      | RIN N/A                                                                                                                     |

**Fragment table for sample 5 : G-1 1**

| Name | Start Size [nt] | End Size [nt] | Area | % of total Area |
|------|-----------------|---------------|------|-----------------|
| 18S  | 1,670           | 2,011         | 81.5 | 28.9            |
| 28S  | 3,123           | 4,106         | 10.4 | 3.7             |

Assay Class: Eukaryote Total RNA Nano  
 Data Path: C:\...Eukaryote Total RNA Nano\_DE13804083\_2014-04-15\_13-05-22.xad

Created: 15/04/2014 1:05:21 PM  
 Modified: 15/04/2014 1:29:08 PM

**Electropherogram Summary Continued ...**

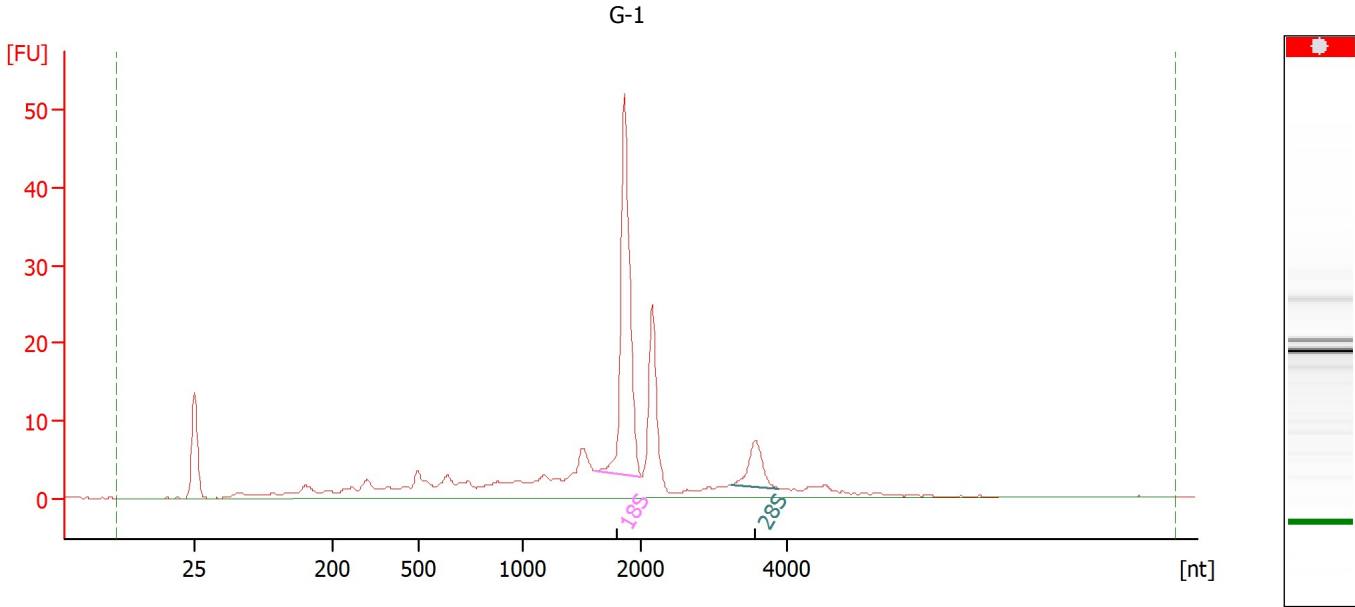

**Overall Results for sample 6 : G-1**

|                         |           |                             |                                                                                                                             |
|-------------------------|-----------|-----------------------------|-----------------------------------------------------------------------------------------------------------------------------|
| RNA Area:               | 221.1     | RNA Integrity Number (RIN): | N/A (B.02.08)                                                                                                               |
| RNA Concentration:      | 160 ng/μl | Result Flagging Color:      | <span style="background-color: #cccccc; border: 1px solid black; display: inline-block; width: 20px; height: 10px;"></span> |
| rRNA Ratio [28s / 18s]: | 0.2       | Result Flagging Label:      | RIN N/A                                                                                                                     |

**Fragment table for sample 6 : G-1**

| Name | Start Size [nt] | End Size [nt] | Area | % of total Area |
|------|-----------------|---------------|------|-----------------|
| 18S  | 1,621           | 2,022         | 54.4 | 24.6            |
| 28S  | 3,227           | 3,895         | 9.5  | 4.3             |

Assay Class: Eukaryote Total RNA Nano  
 Data Path: C:\...Eukaryote Total RNA Nano\_DE13804083\_2014-04-15\_13-05-22.xad

Created: 15/04/2014 1:05:21 PM  
 Modified: 15/04/2014 1:29:08 PM

**Electropherogram Summary Continued ...**

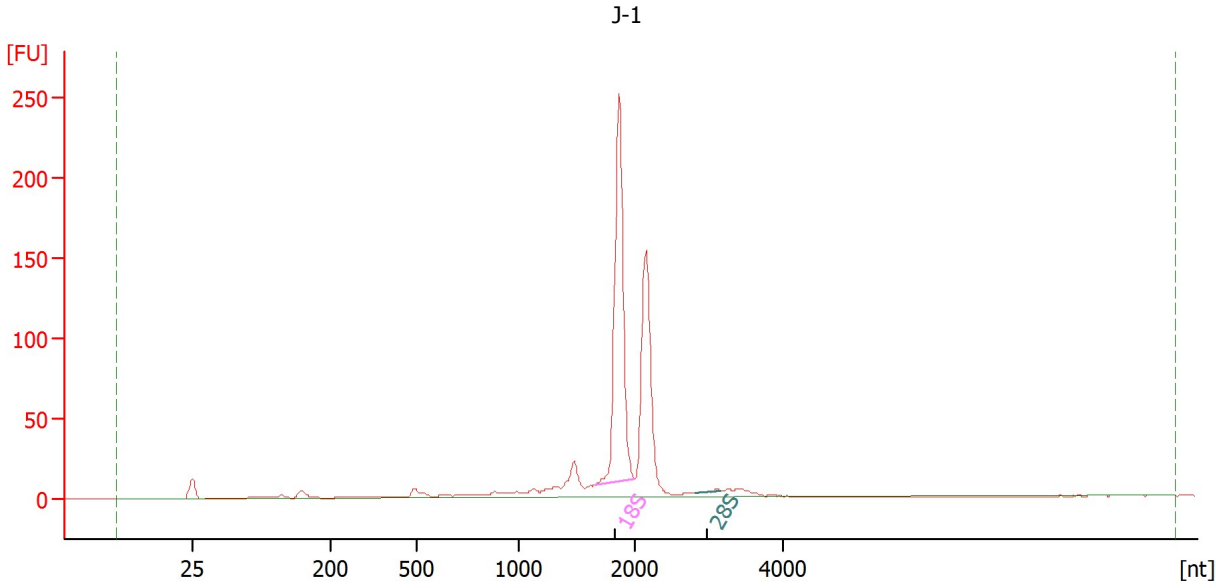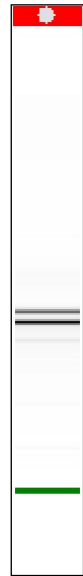

**Overall Results for sample 7 : J-1**

|                         |           |                             |                                                                                                                             |
|-------------------------|-----------|-----------------------------|-----------------------------------------------------------------------------------------------------------------------------|
| RNA Area:               | 630.3     | RNA Integrity Number (RIN): | N/A (B.02.08)                                                                                                               |
| RNA Concentration:      | 456 ng/μl | Result Flagging Color:      | <span style="background-color: #cccccc; border: 1px solid black; display: inline-block; width: 20px; height: 10px;"></span> |
| rRNA Ratio [28s / 18s]: | 0.0       | Result Flagging Label:      | RIN N/A                                                                                                                     |

**Fragment table for sample 7 : J-1**

| Name | Start Size [nt] | End Size [nt] | Area  | % of total Area |
|------|-----------------|---------------|-------|-----------------|
| 18S  | 1,645           | 1,994         | 254.1 | 40.3            |
| 28S  | 2,792           | 3,171         | 1.3   | 0.2             |

Assay Class: Eukaryote Total RNA Nano  
 Data Path: C:\...Eukaryote Total RNA Nano\_DE13804083\_2014-04-15\_13-05-22.xad

Created: 15/04/2014 1:05:21 PM  
 Modified: 15/04/2014 1:29:08 PM

**Electropherogram Summary Continued ...**

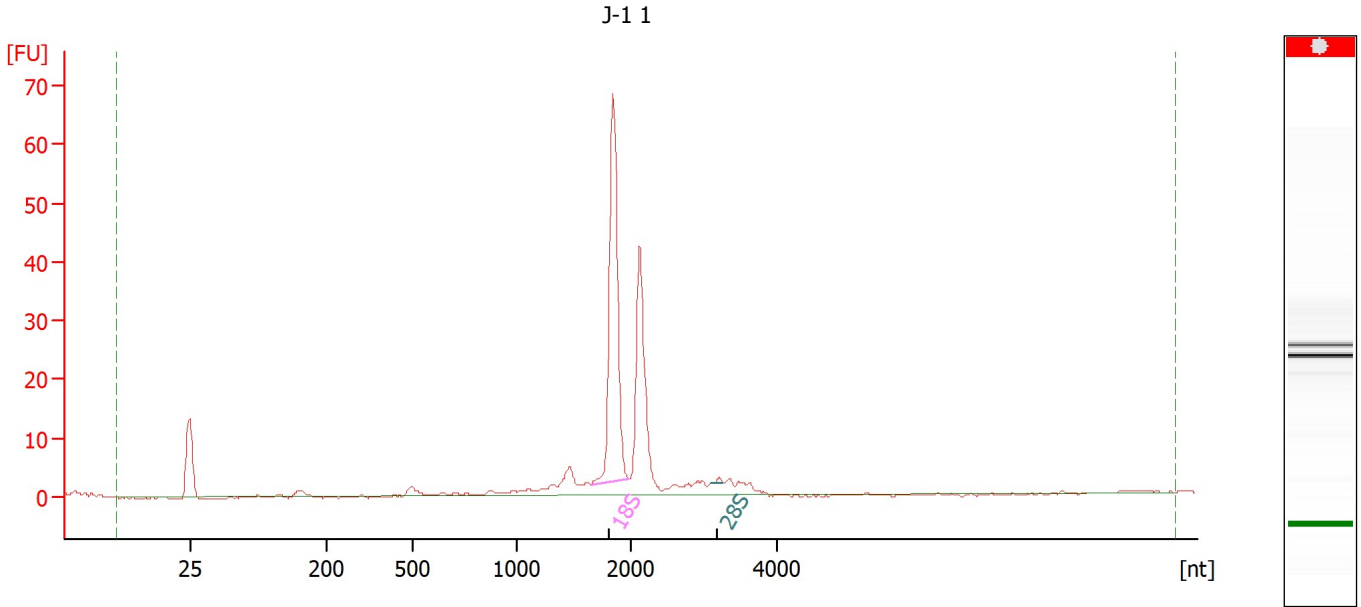

**Overall Results for sample 8 : J-1 1**

|                         |           |                             |                                                                                                                             |
|-------------------------|-----------|-----------------------------|-----------------------------------------------------------------------------------------------------------------------------|
| RNA Area:               | 165.4     | RNA Integrity Number (RIN): | N/A (B.02.08)                                                                                                               |
| RNA Concentration:      | 120 ng/μl | Result Flagging Color:      | <span style="background-color: #cccccc; border: 1px solid black; display: inline-block; width: 20px; height: 10px;"></span> |
| rRNA Ratio [28s / 18s]: | 0.0       | Result Flagging Label:      | RIN N/A                                                                                                                     |

**Fragment table for sample 8 : J-1 1**

| Name | Start Size [nt] | End Size [nt] | Area | % of total Area |
|------|-----------------|---------------|------|-----------------|
| 18S  | 1,642           | 1,974         | 65.8 | 39.8            |
| 28S  | 3,071           | 3,262         | 0.6  | 0.3             |

Assay Class: Eukaryote Total RNA Nano  
 Data Path: C:\...Eukaryote Total RNA Nano\_DE13804083\_2014-04-15\_13-05-22.xad

Created: 15/04/2014 1:05:21 PM  
 Modified: 15/04/2014 1:29:08 PM

**Electropherogram Summary Continued ...**

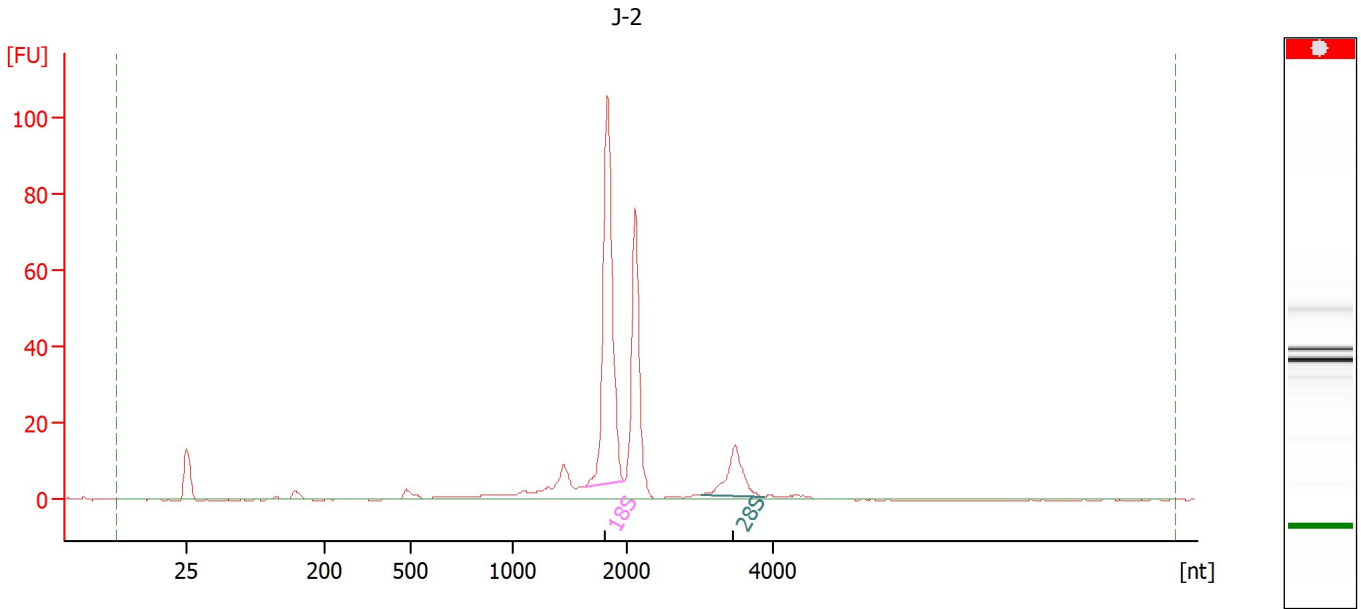

**Overall Results for sample 9 : J-2**

|                         |           |                             |                                                                                                                             |
|-------------------------|-----------|-----------------------------|-----------------------------------------------------------------------------------------------------------------------------|
| RNA Area:               | 290.2     | RNA Integrity Number (RIN): | N/A (B.02.08)                                                                                                               |
| RNA Concentration:      | 210 ng/μl | Result Flagging Color:      | <span style="background-color: #cccccc; border: 1px solid black; display: inline-block; width: 20px; height: 10px;"></span> |
| rRNA Ratio [28s / 18s]: | 0.2       | Result Flagging Label:      | RIN N/A                                                                                                                     |

**Fragment table for sample 9 : J-2**

| Name | Start Size [nt] | End Size [nt] | Area  | % of total Area |
|------|-----------------|---------------|-------|-----------------|
| 18S  | 1,620           | 1,972         | 122.6 | 42.2            |
| 28S  | 3,000           | 3,897         | 23.0  | 7.9             |

Assay Class: Eukaryote Total RNA Nano  
 Data Path: C:\...Eukaryote Total RNA Nano\_DE13804083\_2014-04-15\_13-05-22.xad

Created: 15/04/2014 1:05:21 PM  
 Modified: 15/04/2014 1:29:08 PM

**Electropherogram Summary Continued ...**

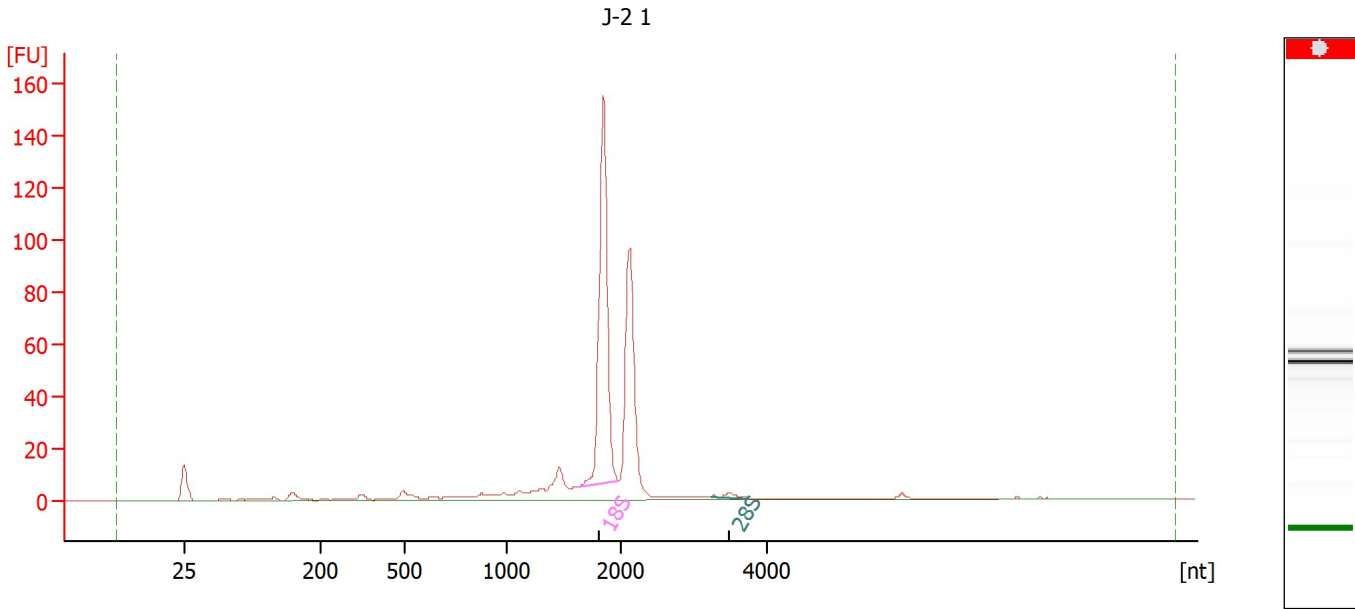

**Overall Results for sample 10 : J-2 1**

|                         |           |                             |                                                                                                                             |
|-------------------------|-----------|-----------------------------|-----------------------------------------------------------------------------------------------------------------------------|
| RNA Area:               | 398.2     | RNA Integrity Number (RIN): | N/A (B.02.08)                                                                                                               |
| RNA Concentration:      | 288 ng/μl | Result Flagging Color:      | <span style="background-color: #cccccc; border: 1px solid black; display: inline-block; width: 20px; height: 10px;"></span> |
| rRNA Ratio [28s / 18s]: | 0.0       | Result Flagging Label:      | RIN N/A                                                                                                                     |

**Fragment table for sample 10 : J-2 1**

| Name | Start Size [nt] | End Size [nt] | Area  | % of total Area |
|------|-----------------|---------------|-------|-----------------|
| 18S  | 1,633           | 1,969         | 154.3 | 38.7            |
| 28S  | 3,224           | 3,772         | 3.3   | 0.8             |

Assay Class: Eukaryote Total RNA Nano  
 Data Path: C:\...Eukaryote Total RNA Nano\_DE13804083\_2014-04-15\_13-05-22.xad

Created: 15/04/2014 1:05:21 PM  
 Modified: 15/04/2014 1:29:08 PM

**Electropherogram Summary Continued ...**

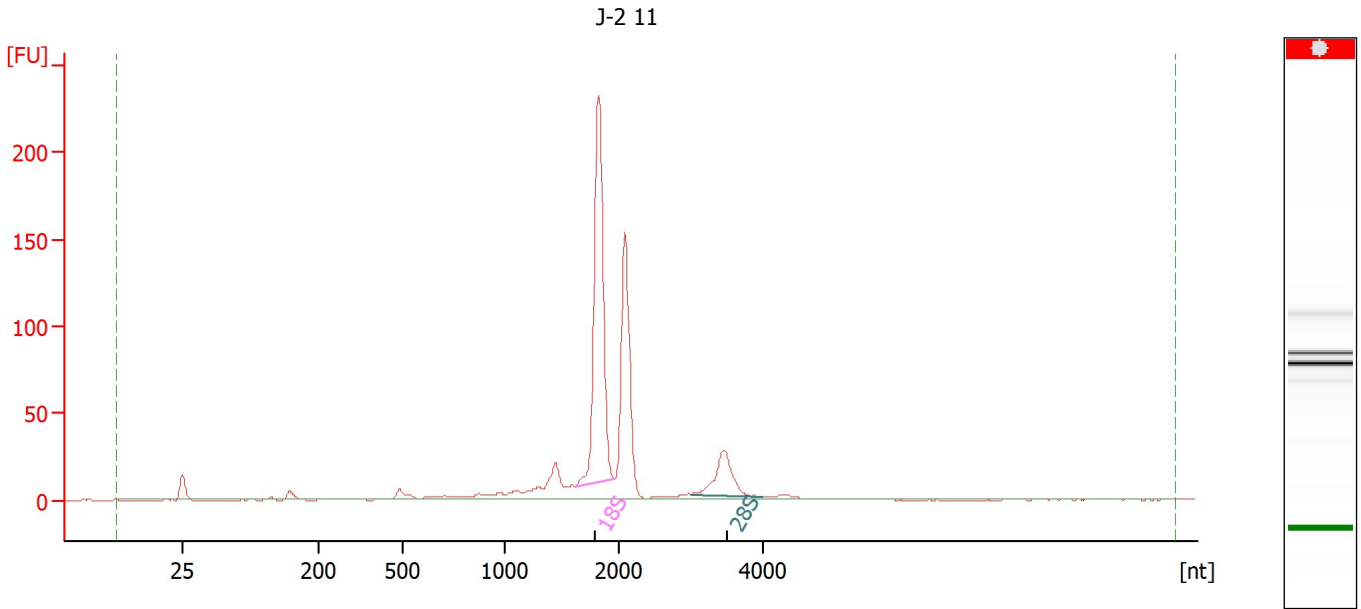

**Overall Results for sample 11 : J-2 11**

|                         |           |                             |                                                                                                                             |
|-------------------------|-----------|-----------------------------|-----------------------------------------------------------------------------------------------------------------------------|
| RNA Area:               | 651.7     | RNA Integrity Number (RIN): | N/A (B.02.08)                                                                                                               |
| RNA Concentration:      | 472 ng/μl | Result Flagging Color:      | <span style="background-color: #cccccc; border: 1px solid black; display: inline-block; width: 20px; height: 10px;"></span> |
| rRNA Ratio [28s / 18s]: | 0.2       | Result Flagging Label:      | RIN N/A                                                                                                                     |

**Fragment table for sample 11 : J-2 11**

| Name | Start Size [nt] | End Size [nt] | Area  | % of total Area |
|------|-----------------|---------------|-------|-----------------|
| 18S  | 1,613           | 1,959         | 250.5 | 38.4            |
| 28S  | 3,003           | 3,997         | 47.3  | 7.3             |

Assay Class: Eukaryote Total RNA Nano  
 Data Path: C:\...Eukaryote Total RNA Nano\_DE13804083\_2014-04-15\_13-05-22.xad

Created: 15/04/2014 1:05:21 PM  
 Modified: 15/04/2014 1:29:08 PM

**Electropherogram Summary Continued ...**

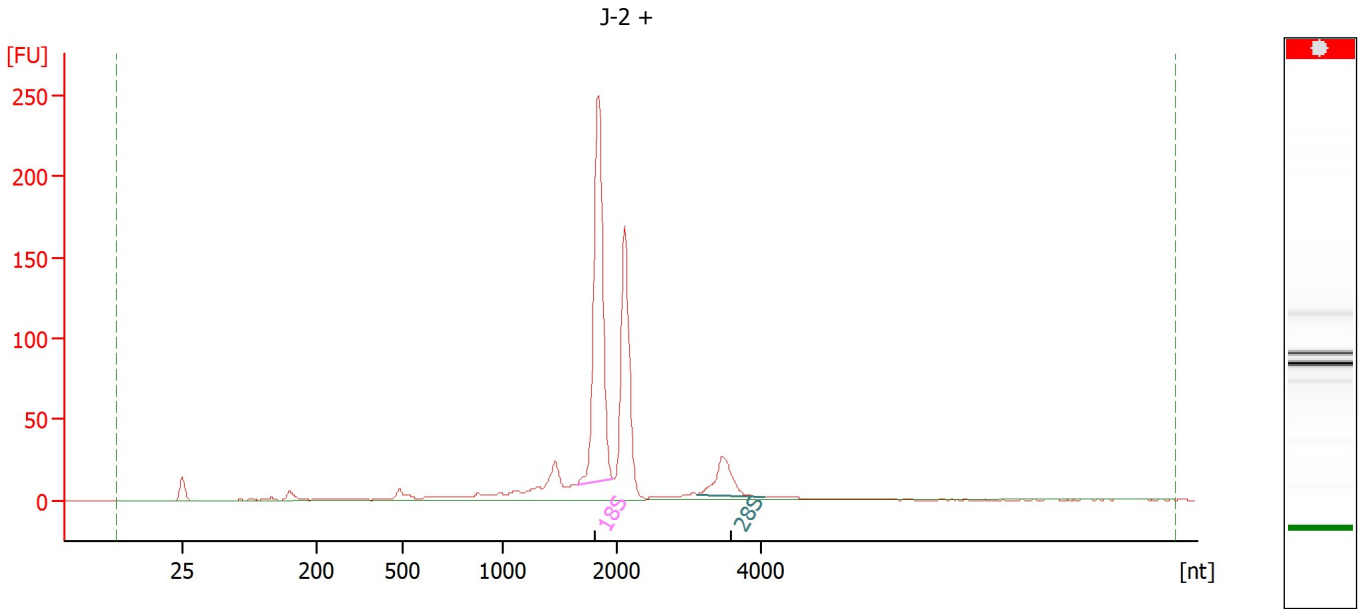

**Overall Results for sample 12 : J-2 +**

|                         |           |                             |                                                                                                                             |
|-------------------------|-----------|-----------------------------|-----------------------------------------------------------------------------------------------------------------------------|
| RNA Area:               | 738.0     | RNA Integrity Number (RIN): | N/A (B.02.08)                                                                                                               |
| RNA Concentration:      | 534 ng/μl | Result Flagging Color:      | <span style="background-color: #cccccc; border: 1px solid black; display: inline-block; width: 20px; height: 10px;"></span> |
| rRNA Ratio [28s / 18s]: | 0.2       | Result Flagging Label:      | RIN N/A                                                                                                                     |

**Fragment table for sample 12 : J-2 +**

| Name | Start Size [nt] | End Size [nt] | Area  | % of total Area |
|------|-----------------|---------------|-------|-----------------|
| 18S  | 1,639           | 1,967         | 271.0 | 36.7            |
| 28S  | 3,107           | 4,044         | 43.7  | 5.9             |



Assay Class: Eukaryote Total RNA Nano  
Data Path: C:\...Eukaryote Total RNA Nano\_DE13804083\_2014-04-15\_13-05-22.xad

Created: 15/04/2014 1:05:21 PM  
Modified: 15/04/2014 1:29:08 PM

**Gel Image**

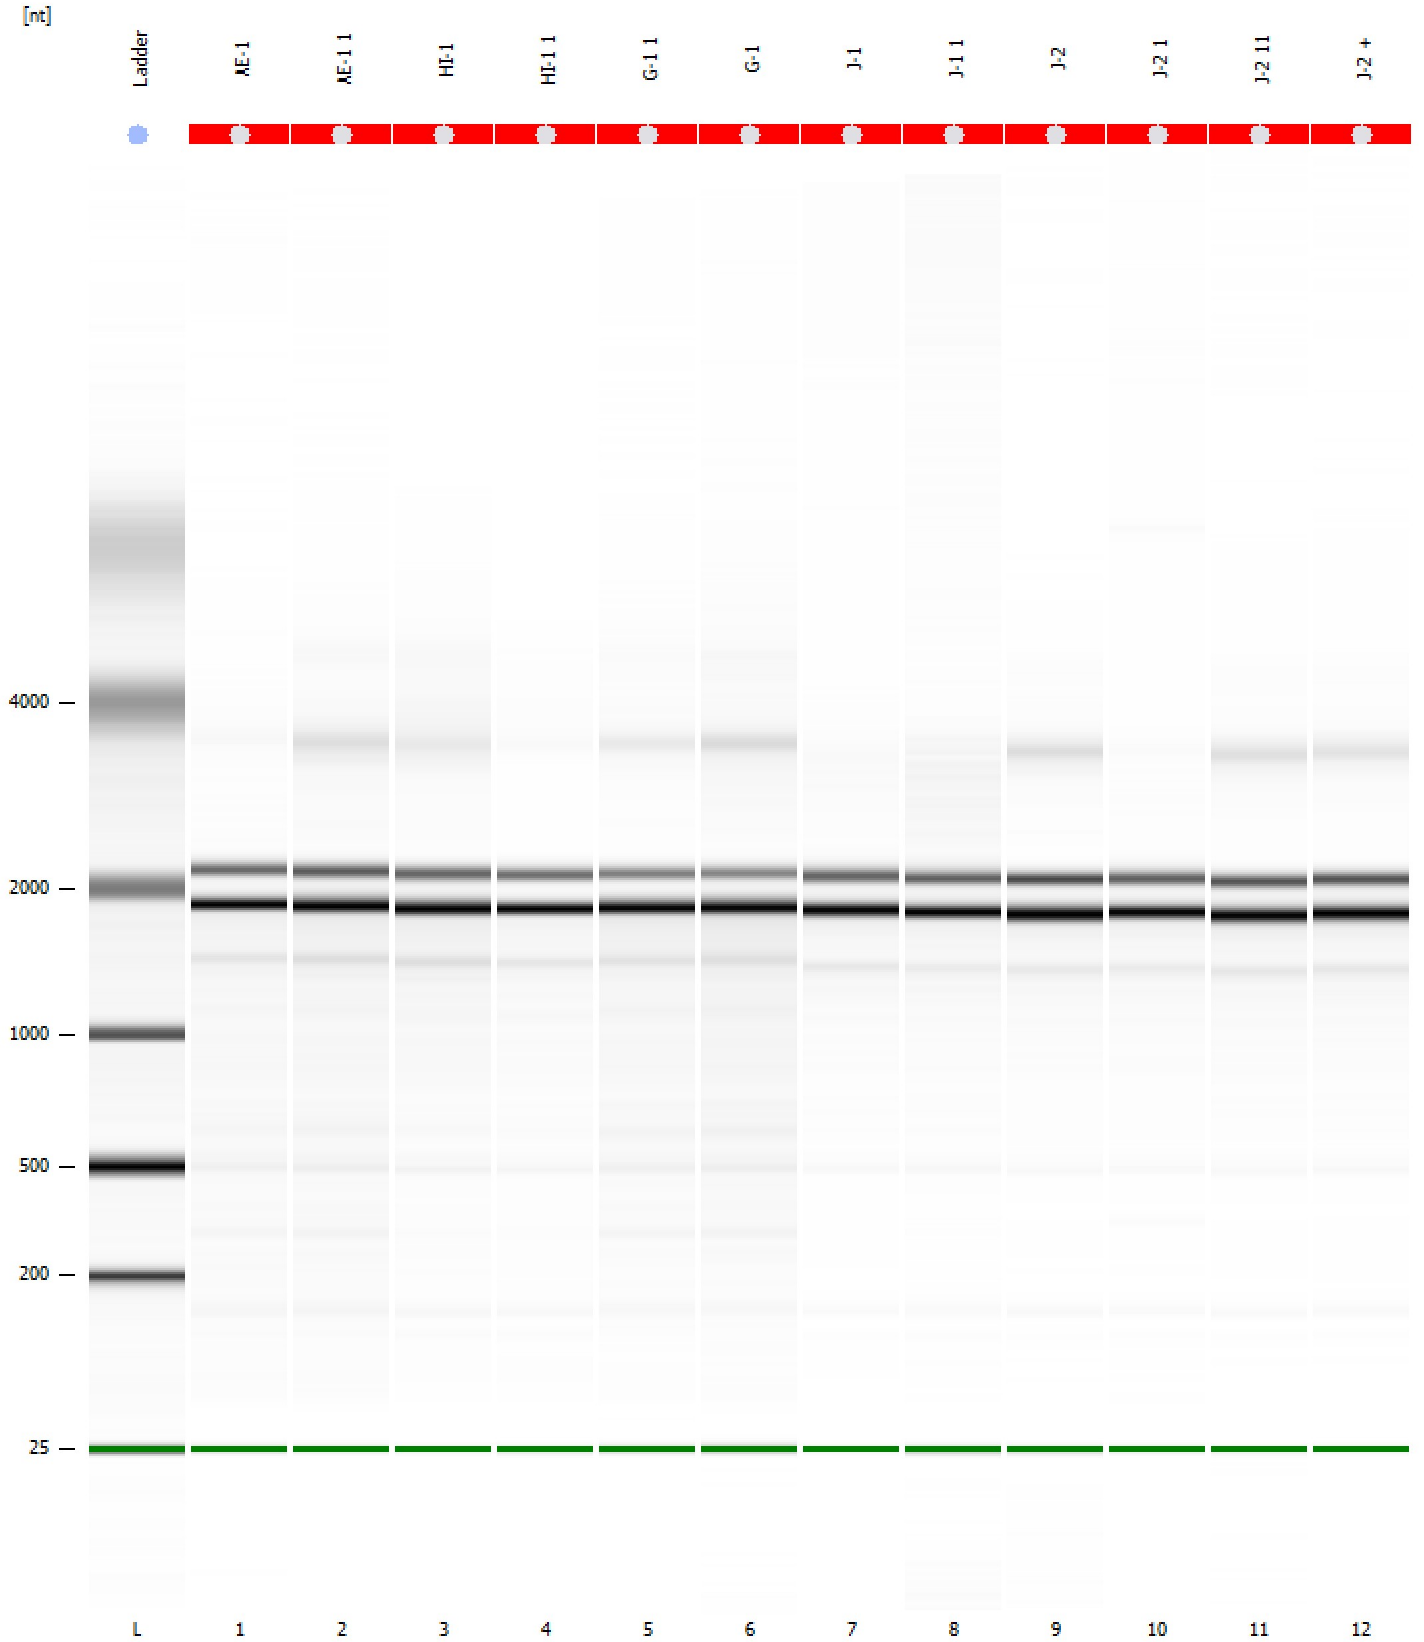

Supplement: peerj-04-2520-s003.pdf [file peerj-04-2520-s003.pdf]
