# Supplementary material for: A transcriptomic scan for potential candidate genes involved in osmoregulation in an obligate freshwater palaemonid prawn (Macrobrachium australiense)
Source: PeerJ journal article supplement (doi:10.7717/peerj.2520), 2016-10-05
Supplement: Supplemental_Information_2.pdf [file Supplemental_Information_2.pdf]

## Supplemental Figure

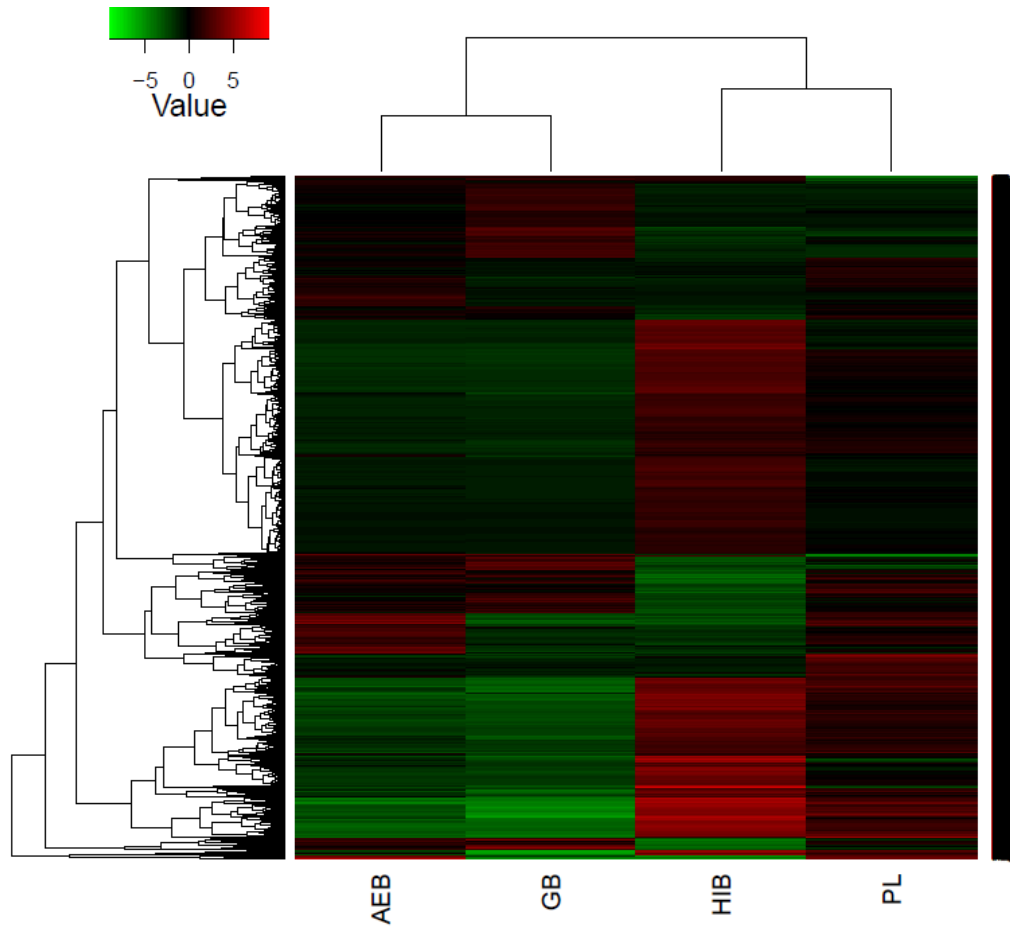

**Supplemental Figure S1:** Heatmap showing differential gene expression pattern (based on read counts) of different tissues of adult and post larvae. AEB= Antennal Gland, GB= Gill, HIB= Hepatopancreas, PL= Post Larvae. **Y-axis represents the hierarchical clustering of differentially expressed transcripts, while red colored lines indicate highly expressed transcripts and green colored lines indicate lowly expressed transcripts.**
